# Supplementary material for: Risk Factors of Clonorchis sinensis Human Infections in Endemic Areas, Haman-Gun, Republic of Korea: A Case-Control Study
Source: PubMed Central journal article supplement — Korean J Parasitol. 2020 Dec 31;58(6):647–52. doi: 10.3347/kjp.2020.58.6.647 (PMC7806425; doi:10.3347/kjp.2020.58.6.647), 2020-12-31
Supplement: kjp-58-6-647-suppl1.pdf [file kjp-58-6-647-suppl1.pdf]

**Supplementary Table S1.** Sociodemographic characteristics of the Haman-gun residents participated in this study. The number of participating residents from 10 administrative towns/villages along rivers within Haman-gun

| Residents           | Nakdong river basin |                   |                  | Nam river basin  |                  | Others   |                 |                   |                 |                   |
|---------------------|---------------------|-------------------|------------------|------------------|------------------|----------|-----------------|-------------------|-----------------|-------------------|
|                     | Chilbuk-<br>myeon   | Chilseo-<br>myeon | Daesan-<br>myeon | Beopsu-<br>myeon | Gunbuk-<br>myeon | Gaya-eup | Sanin-<br>myeon | Chilwon-<br>myeon | Haman-<br>myeon | Yeohang-<br>myeon |
| Total No.           | 2,127               | 6,089             | 3,830            | 3,144            | 6,826            | 19,617   | 2,856           | 20,955            | 2,563           | 930               |
| No. of participants | 502                 | 892               | 674              | 437              | 650              | 542      | 389             | 592               | 252             | 185               |
| %                   | 23.6                | 14.6              | 17.6             | 13.9             | 9.5              | 2.8      | 13.6            | 2.8               | 9.8             | 19.9              |
