# Supplementary material for: Risk Factors of Clonorchis sinensis Human Infections in Endemic Areas, Haman-Gun, Republic of Korea: A Case-Control Study
Source: PubMed Central journal article supplement — Korean J Parasitol. 2020 Dec 31;58(6):647–52. doi: 10.3347/kjp.2020.58.6.647 (PMC7806425; doi:10.3347/kjp.2020.58.6.647), 2020-12-31
Supplement: kjp-58-6-647-suppl2.pdf [file kjp-58-6-647-suppl2.pdf]

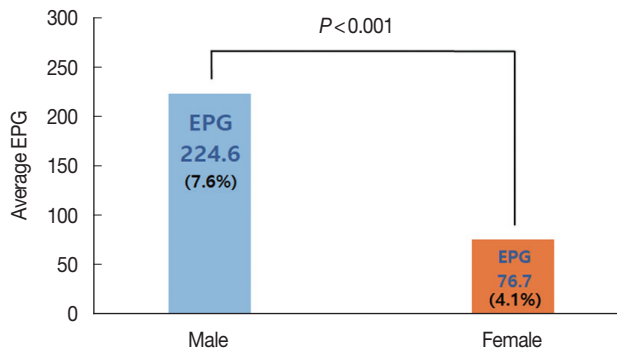

**Supplementary Fig. 1.** *Clonorchis sinensis* egg positivity rate and eggs per gram of fecal matter displayed by gender. EPG, eggs per gram of feces.
